# Supplementary material
Source: PubMed Central journal article supplement (PMC5915914)
Supplement: NIHMS946481-supplement-1.pdf [file NIHMS946481-supplement-1.pdf]

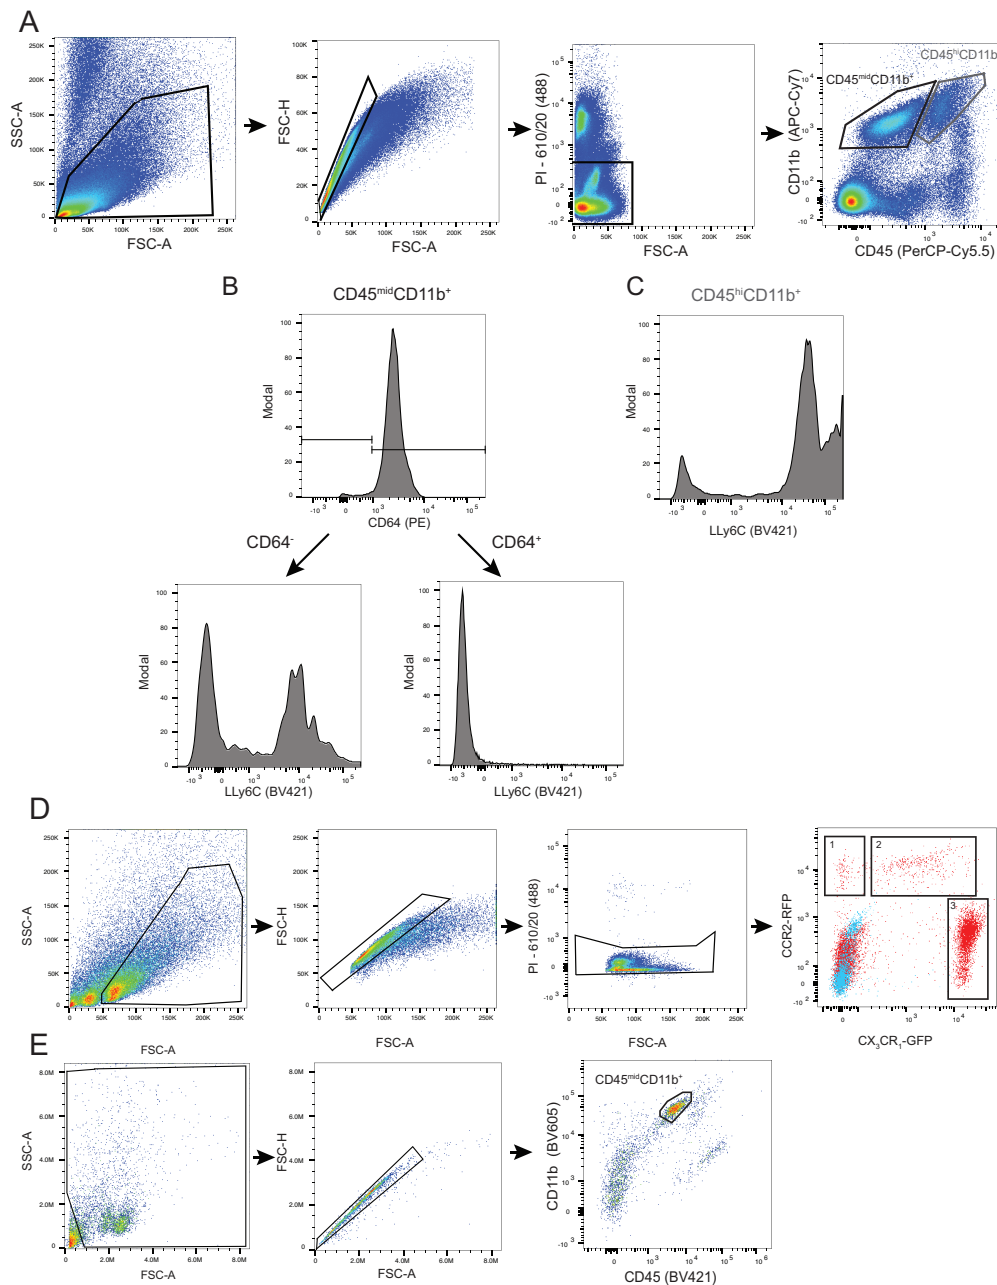

**Fig. S1** Gating scheme for brain cells. Live cells were identified by gating on singlets by forward and side scatter characteristics, followed by PI as a live/dead marker. For wild-type and *SI00A9*<sup>-/-</sup> mice myeloid cells and microglia were identified as either CD45<sup>mid</sup>/CD11b<sup>+</sup> or CD45<sup>hi</sup>/CD11b<sup>+</sup> (A). In the CD45<sup>mid</sup>/CD11b<sup>+</sup> population, CD64<sup>+</sup> cells did not express Ly6C, indicating that these cells were likely microglia or tissue resident macrophages, while some CD64<sup>-</sup> cells did express Ly6C and include some monocytes and neutrophils (B). The CD45<sup>hi</sup>/CD11b<sup>+</sup> population contained a higher proportion of Ly6C<sup>mid</sup> and Ly6C<sup>hi</sup> cells (C). In *CCR2*<sup>RFP/+</sup>::*CX3CR1*<sup>GFP/+</sup> mice, *CX3CR1*-GFP and *CCR2*-RFP expression (red) were compared to fluorescence in wild-type cells (blue) and used to identify *CCR2*<sup>+</sup>/*CX3CR1*<sup>-</sup> monocytes (gate 1), *CCR2*<sup>+</sup>/*CX3CR1*<sup>mid</sup> intermediate cells (gate 2), and *CCR2*<sup>-</sup>/*CX3CR1*<sup>hi</sup> microglia/macrophages (gate 3) (D). For ROS measurements, violet dyes were used to identify CD45<sup>mid</sup>/CD11b<sup>+</sup> cells due to the spectrum of dihydrorhodamine (E).

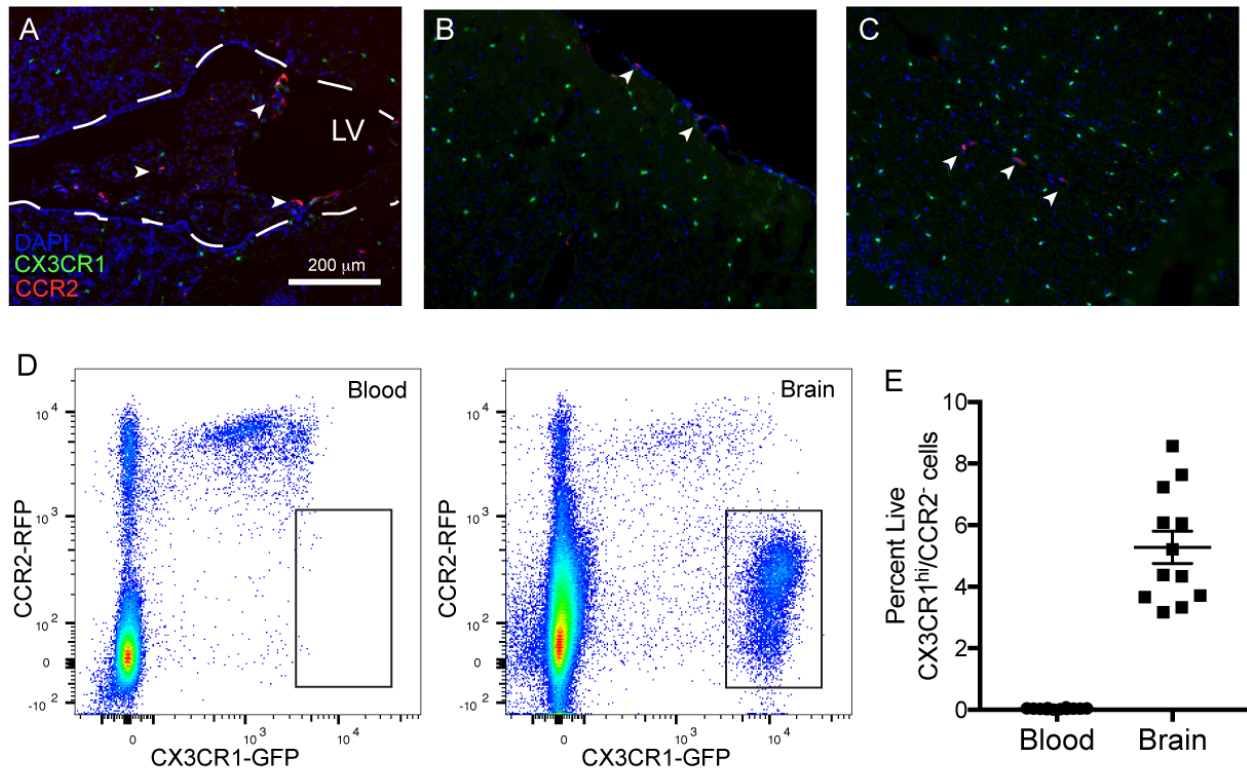

**Fig. S2** Fluorescent microscopy for CCR2-RFP and CX<sub>3</sub>CR<sub>1</sub>-GFP shows the presence of RFP+ cells (arrowheads) in expected locations such as choroid plexus (A), meninges (B), and around parenchymal blood vessels (C) 14 days after CLP. We did not observe an parenchymal collections of monocytes in abnormal locations (n = 4 mice). Flow cytometric examination of blood or brain lysates after enzymatic dissociation shows that although CX<sub>3</sub>CR<sub>1</sub>-GFP is expressed by circulating cells, these cells are nearly uniformly CCR2-RFP positive and exhibit lower GFP expression than do GFP expressing cells isolated from the brain (D, box). Gating on CX<sub>3</sub>CR<sub>1</sub>-GFP<sup>+</sup>/CCR2-RFP<sup>-</sup> cells nearly completely excludes circulating cells (E).

**Table S1** Cause of death of patients whose post-mortem brain tissue was examined.

| Age (years)                       | Sex | Neuropathologic diagnosis      | Duration of hospitalization (days) | Terminal events                                                                                                                                                                                                                                                                                         |
|-----------------------------------|-----|--------------------------------|------------------------------------|---------------------------------------------------------------------------------------------------------------------------------------------------------------------------------------------------------------------------------------------------------------------------------------------------------|
| <b>Subjects with sepsis</b>       |     |                                |                                    |                                                                                                                                                                                                                                                                                                         |
| 90                                | M   | Alzheimer's Disease            | 5                                  | Respiratory failure secondary to pneumonia without antecedent hemodynamic instability.                                                                                                                                                                                                                  |
| 76                                | F   | Alzheimer's Disease            | <1                                 | Suspected mesenteric ischemia leading to respiratory arrest with post-intubation cardiac arrest and successful resuscitation followed by shock for 12 hours prior to death.                                                                                                                             |
| 78                                | F   | Alzheimer's Disease            | <1                                 | Urinary tract infection. Hypotensive on presentation with response to a single 250 cc fluid bolus, followed within 12 hours by Kussmaul respirations and respiratory arrest.                                                                                                                            |
| 49                                | M   | Huntington's Disease           | 17                                 | Seventeen day hospitalization for recurrent aspiration pneumonia with bronchopleural fistula. Patient became hypotensive 24 hours before death and did not receive resuscitation other than antibiotics due to goals of care.                                                                           |
| 43                                | M   | None                           | 2                                  | Hemodynamically stable on presentation for management of intraabdominal abscess and colenteric fistula. Patient had a sudden cardiac arrest prior to planned surgical management and could not be resuscitated. Autopsy demonstrated ruptured intraperitoneal abscess.                                  |
| 84                                | F   | Alzheimer's Disease            | 1                                  | Urinary tract infection. Hypotensive on presentation with lactate of 17 after 4 days of illness at home. Received only antibiotics and normal saline at 150 cc/hr due to goals of care.                                                                                                                 |
| 80                                | F   | None                           | 7                                  | Hypotensive on ICU transfer for multifocal pneumonia, with intermittent vasopressor requirements. Patient had worsening multiorgan failure and care was transitioned to comfort measures less than 24 hours prior to death.                                                                             |
| 78                                | F   | Progressive supranuclear palsy | 6                                  | Presented with pneumonia. Hypotensive on presentation and responded to fluid resuscitation. Patient had worsening hypoxia without hemodynamic instability over the following days prompting transition to comfort care less than 24 hours prior to death.                                               |
| 83                                | F   | None                           | <1                                 | In shock and respiratory distress on presentation to the emergency department and progressed to cardiac arrest. Patient had been seen and was hemodynamically stable the day prior to presentation. Patient had been treated beginning 5 days prior to presentation for UTI with altered mental status. |
| <b>Subjects without infection</b> |     |                                |                                    |                                                                                                                                                                                                                                                                                                         |
| 45                                | F   | Amyotrophic lateral sclerosis  | <1                                 | Sudden respiratory arrest after G-tube placement                                                                                                                                                                                                                                                        |
| 82                                | F   | None                           | <1                                 | Cardiogenic shock after abdominal aortic aneurysm repair.                                                                                                                                                                                                                                               |
| 85                                | F   | None                           | <1                                 | Unwitnessed in-hospital cardiac arrest during workup of thrombocytopenia                                                                                                                                                                                                                                |
| 75                                | F   | Progressive supranuclear palsy | <1                                 | Bradycardia and respiratory arrest. Fall with head injury.                                                                                                                                                                                                                                              |
| 43                                | M   | None                           | <1                                 | Myocardial infarction and arrhythmia                                                                                                                                                                                                                                                                    |
| 69                                | M   | None                           | <1                                 | Cardiac arrest during pacemaker placement                                                                                                                                                                                                                                                               |

**Table S2** Probe sequences for in situ hybridization

| Probe      | Sequence                                                                                                    |
|------------|-------------------------------------------------------------------------------------------------------------|
| S100A8-1   | 5'-CAA TGA GGT /iAmMC6T/GC TCA AGG CC/iAmMC6T/ TCT CCA<br>GT/iAmMC6T/ CAG ACG GCA TTG /iAmMC6T/CA CGA AA-3' |
| S100A8-2   | 5'-C/iAmMC6T/G TAG ACA TA/iAmMC6T/ CCA GGG ACC CAG CCC<br>/iAmMC6T/AG GCC AGA AGC /iAmMC6T/CT GCT ACT CC-3' |
| S100A8-3   | 5'-GTG GC/iAmMC6T/ GTC TTT GTG AGA /iAmMC6T/GC CAC ACC CAC<br>/iAmMC6T/TT TAT CAC CA/iAmMC6T/ CGC AAG GA-3' |
| Actin-1    | 5'-AAG /iAmMC6T/TA GGT TTT G/iAmMC6T/C AAA GAA AGG<br>G/iAmMC6T/G TAA AAC GCA GCT CAG /iAmMC6T/AA CAG TC-3' |
| Actin-2    | 5'-CCT T/iAmMC6T/G GGA GGG TGA GGG ACT /iAmMC6T/CC TGT AAC<br>CAT C/iAmMC6T/A TGC CGT GGA /iAmMC6T/AC TT-3' |
| Scramble-1 | 5'-CT/iAmMC6T/ GGT GCA TGG AAG G/iAmMC6T/T GTG CTG ACG TGG<br>GA/iAmMC6T/ CAC TTA CTC CCA A/iAmMC6T/G TT-3' |
| Scramble-2 | 5'-AAG /iAmMC6T/CT TAG ACG AAC AT/iAmMC6T/ TTG ACG TCT CGA<br>A/iAmMC6T/G CGG GTA AAA G/iAmMC6T/A AAG AG-3' |
